# Supplementary material for: The Impact of ETV6-NTRK3 Oncogenic Gene Fusions on Molecular and Signaling Pathway Alterations
Source: MDPI journal article supplement (doi:10.3390/cancers15174246), 2023-08-24

Cell cycle

Kinase signaling

Rho GTPase signaling

## EN cluster

| Pathway name                                                                           | p Value  |
|----------------------------------------------------------------------------------------|----------|
| Signaling by Rho GTPases                                                               | 2.89E-08 |
| Signaling by Rho GTPases, Miro GTPases and RHOBTB3                                     | 3.74E-08 |
| RHO GTPase cycle                                                                       | 1.50E-06 |
| G2/M DNA replication checkpoint                                                        | 4.57E-06 |
| Activation of NIMA Kinases NEK9, NEK6, NEK7                                            | 2.65E-05 |
| Mitotic Prometaphase                                                                   | 3.10E-05 |
| Signaling by phosphorylated juxtamembrane, extracellular and kinase domain KIT mutants | 3.24E-05 |
| Signaling by KIT in disease                                                            | 3.24E-05 |
| Golgi Cisternae Pericentriolar Stack Reorganization                                    | 3.81E-05 |
| Cyclin A/B1/B2 associated events during G2/M transition                                | 4.88E-05 |
| Resolution of Sister Chromatid Cohesion                                                | 6.42E-05 |
| RHOV GTPase cycle                                                                      | 6.64E-05 |
| Regulation of PLK1 Activity at G2/M Transition                                         | 9.59E-05 |
| Signaling by Hippo                                                                     | 1.08E-04 |
| Factors involved in megakaryocyte development and platelet production                  | 1.14E-04 |
| Chk1/Chk2(Cds1) mediated inactivation of Cyclin B:Cdk1 complex                         | 1.52E-04 |
| MET promotes cell motility                                                             | 1.65E-04 |
| Interferon alpha/beta signaling                                                        | 1.67E-04 |
| Nuclear Envelope Breakdown                                                             | 1.70E-04 |
| SARS-CoV-1 Genome Replication and Transcription                                        | 1.91E-04 |

## Shared cluster

| Pathway name                                                                          | p Value  |
|---------------------------------------------------------------------------------------|----------|
| RHOV GTPase cycle                                                                     | 1.42E-08 |
| RHO GTPase cycle                                                                      | 2.22E-06 |
| RHOJ GTPase cycle                                                                     | 4.35E-06 |
| RAC1 GTPase cycle                                                                     | 1.22E-05 |
| AURKA Activation by TPX2                                                              | 2.36E-05 |
| SHC-related events triggered by IGF1R                                                 | 3.94E-05 |
| CDC42 GTPase cycle                                                                    | 4.46E-05 |
| Recruitment of NuMA to mitotic centrosomes                                            | 4.65E-05 |
| IGF1R signaling cascade                                                               | 5.36E-05 |
| Signaling by Type 1 Insulin-like Growth Factor 1 Receptor (IGF1R)                     | 5.62E-05 |
| RHOV GTPase cycle                                                                     | 9.49E-05 |
| RHOQ GTPase cycle                                                                     | 1.26E-04 |
| Signaling by Erythropoietin                                                           | 2.82E-04 |
| Anchoring of the basal body to the plasma membrane                                    | 3.81E-04 |
| Recruitment of mitotic centrosome proteins and complexes                              | 4.16E-04 |
| Loss of Nlp from mitotic centrosomes                                                  | 4.41E-04 |
| Loss of proteins required for interphase microtubule organization from the centrosome | 4.94E-04 |
| InlB-mediated entry of Listeria monocytogenes into host cell                          | 5.34E-04 |
| Centrosome maturation                                                                 | 6.80E-04 |
| Signaling by MET                                                                      | 7.74E-04 |

## EN+i cluster

| Pathway name                                                                        | p Value  |
|-------------------------------------------------------------------------------------|----------|
| Diseases of signal transduction by growth factor receptors and second messengers    | 1.72E-09 |
| Signaling by Interleukins                                                           | 6.76E-07 |
| Cytokine Signaling in Immune system                                                 | 2.51E-06 |
| Interleukin-1 family signaling                                                      | 4.24E-06 |
| Interleukin-1 signaling                                                             | 5.69E-06 |
| Constitutive Signaling by EGFRvIII                                                  | 5.69E-06 |
| Signaling by EGFRvIII in Cancer                                                     | 5.69E-06 |
| Signaling by EGFR in Cancer                                                         | 6.37E-06 |
| Signaling by PTK6                                                                   | 1.21E-05 |
| Signaling by Non-Receptor Tyrosine Kinases                                          | 1.21E-05 |
| VEGFA-VEGFR2 Pathway                                                                | 1.48E-05 |
| VEGFR2 mediated vascular permeability                                               | 1.53E-05 |
| Signaling by VEGF                                                                   | 1.72E-05 |
| Signal Transduction                                                                 | 2.13E-05 |
| Signaling by Rho GTPases                                                            | 2.13E-05 |
| Signaling by Rho GTPases, Miro GTPases and RHOBTB3                                  | 2.61E-05 |
| JNK (c-Jun kinases) phosphorylation and activation mediated by activated human TAK1 | 2.68E-05 |
| activated TAK1 mediates p38 MAPK activation                                         | 3.06E-05 |
| Signaling by ALK fusions and activated point mutants                                | 3.91E-05 |
| Signaling by ALK in cancer                                                          | 3.91E-05 |

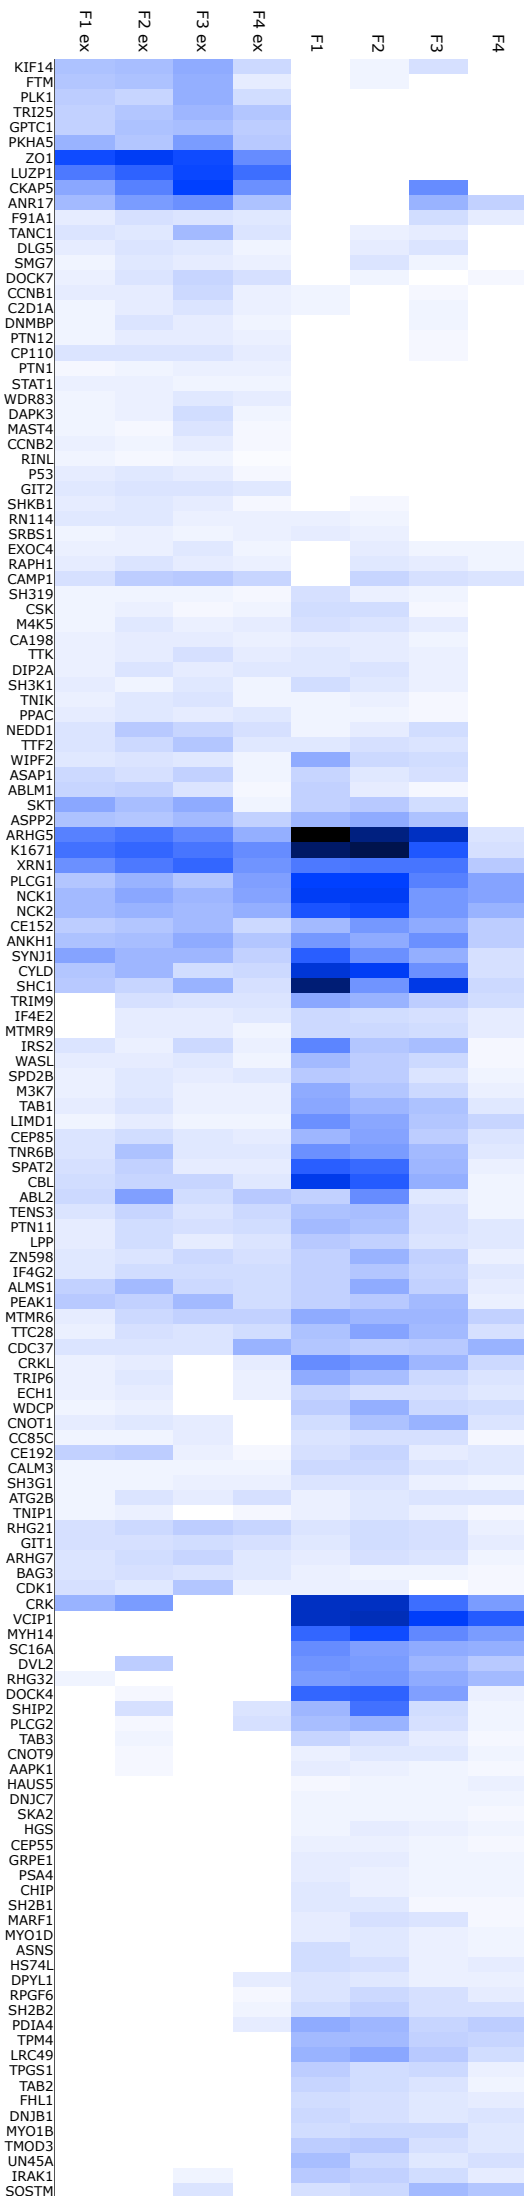

Supplement: s1 [file s1]
