# Supplementary material for: The Impact of ETV6-NTRK3 Oncogenic Gene Fusions on Molecular and Signaling Pathway Alterations
Source: MDPI journal article supplement (doi:10.3390/cancers15174246), 2023-08-24
Supplement: s1 [file s1]

## Supplementary Figure legends

### Examining the Impact of ETV6-NTRK3 Oncogenic Gene Fusions on Molecular and Signaling Pathway Alterations

Matias Kinnunen <sup>1,2</sup>, Xiaonan Liu <sup>1,2</sup>, Elina Niemelä <sup>1,2</sup>, Tiina Öhman <sup>1,2</sup>, Lisa Gawriyski <sup>1,2</sup>, Kari Salokas <sup>1,2</sup>, Salla Keskitalo <sup>1,2</sup>, Markku Varjosalo <sup>1,2</sup>.

1 Institute of Biotechnology, University of Helsinki, 00014 Helsinki, Finland

2 Helsinki Institute of Life Science, University of Helsinki, 00014 Helsinki, Finland

#### **Supplementary Figure S1.** EN and EN+i interactome comparisons.

This figure shows the analysis of clustered interactors from Figure 2 C, using reactome terms. The terms related to the overrepresented term areas are color-coded: green for cell cycle, blue for kinase signaling, and orange for Rho GTPase signaling

#### **Supplementary Figure S2.** Comparison of EN, EN2, ETV6, and NTRK3 interactors.

A) Venn diagram showing the overlap of interactors for EN1-4, EN2, ETV6, and NTRK3.

B) KEGG pathway analysis of EN1-4 unique interactors that were not found in wild type ETV6 or NTRK3.

#### **Supplementary Figure S3.** Venn diagram comparison of EN2, EN2 treated with selitrectinib, and EN2 +i interactomes.

This figure shows a Venn diagram comparing the interactomes of EN2, EN2 treated with selitrectinib, and EN2+i.
