# Supplementary figures and images for: The Impact of ETV6-NTRK3 Oncogenic Gene Fusions on Molecular and Signaling Pathway Alterations
Source: MDPI journal article supplement (doi:10.3390/cancers15174246), 2023-08-24

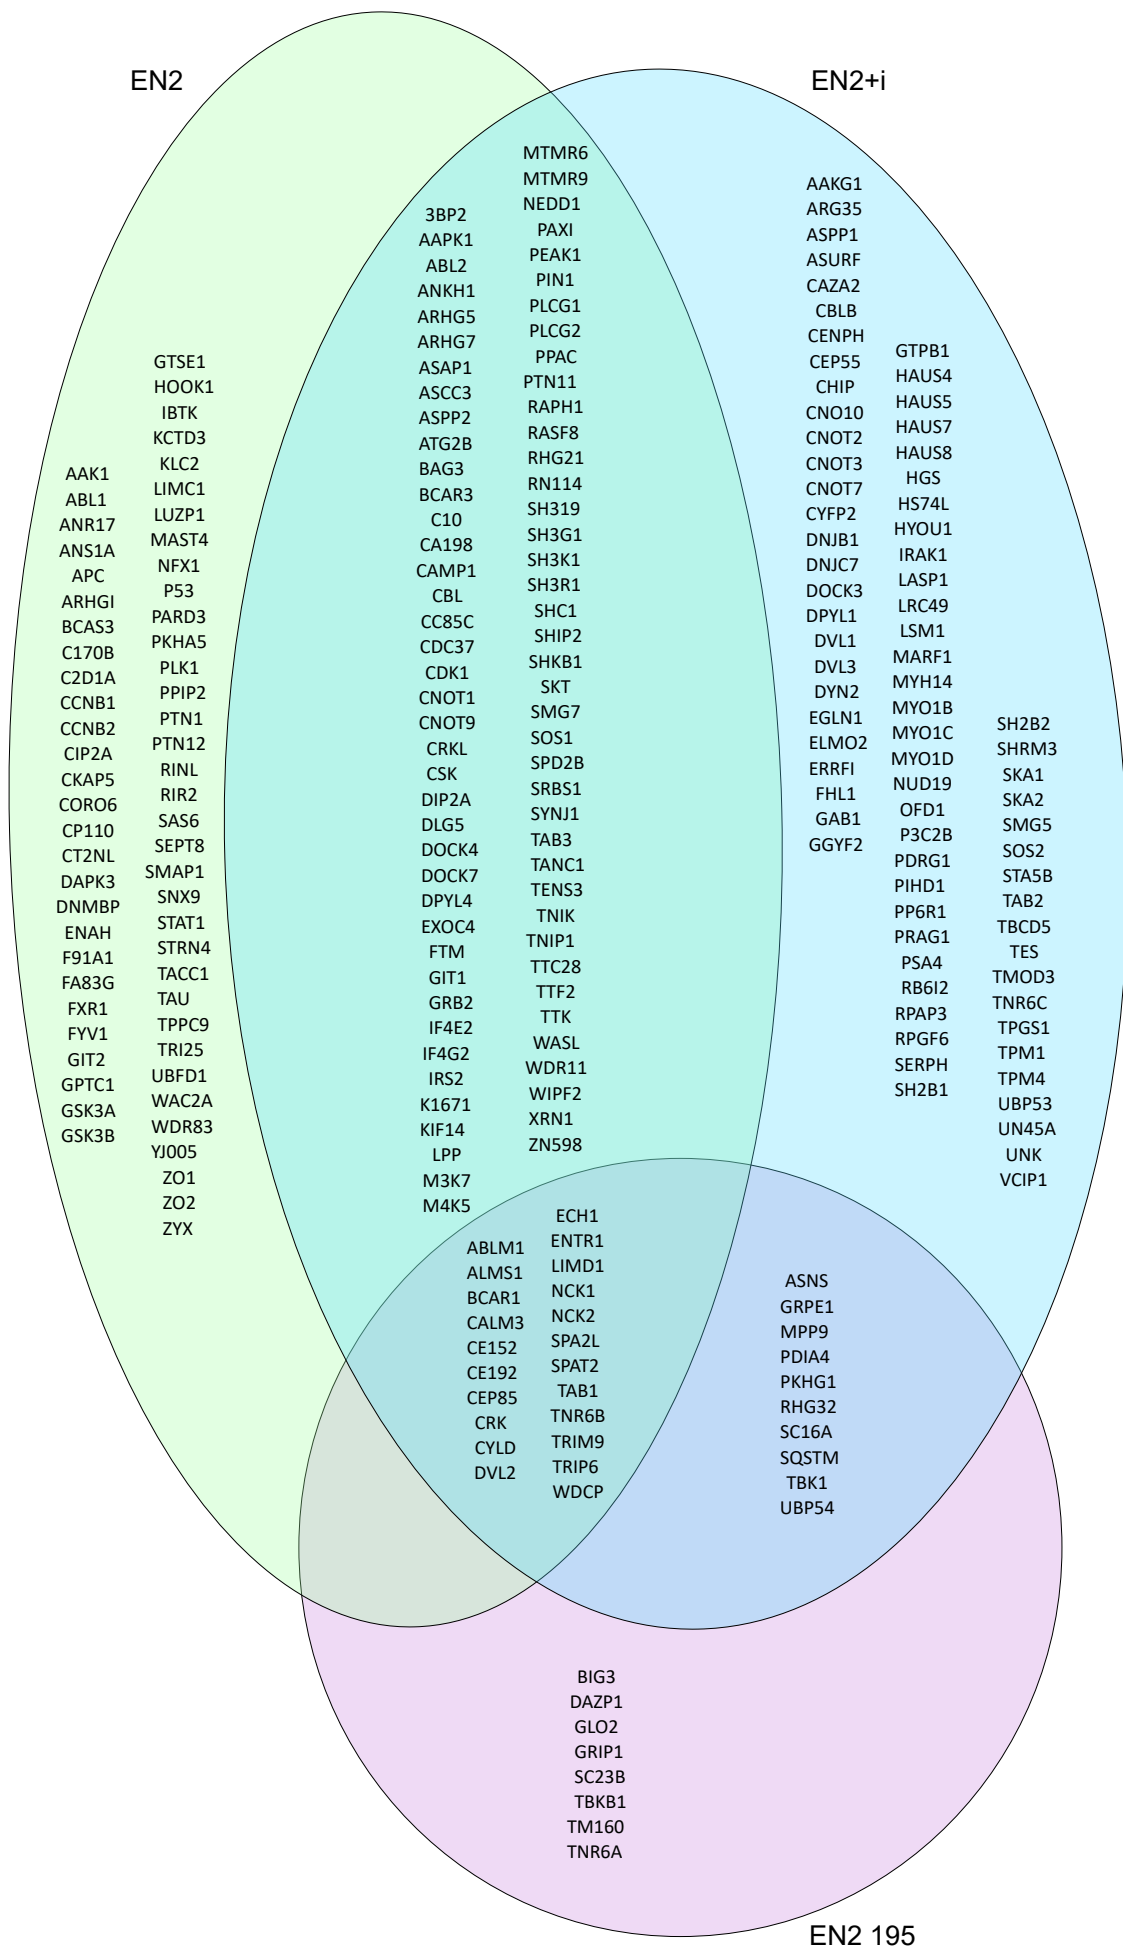

Supplement: s1 [file s1]

**A**

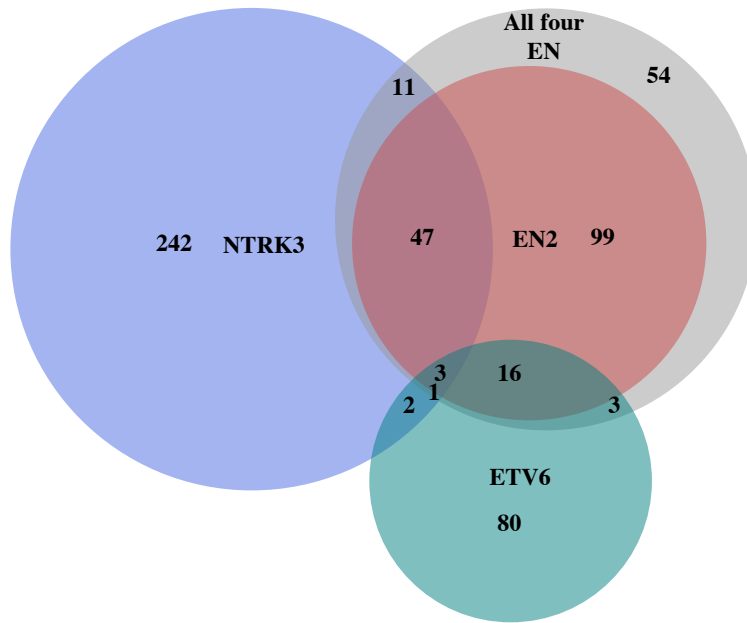

**B**

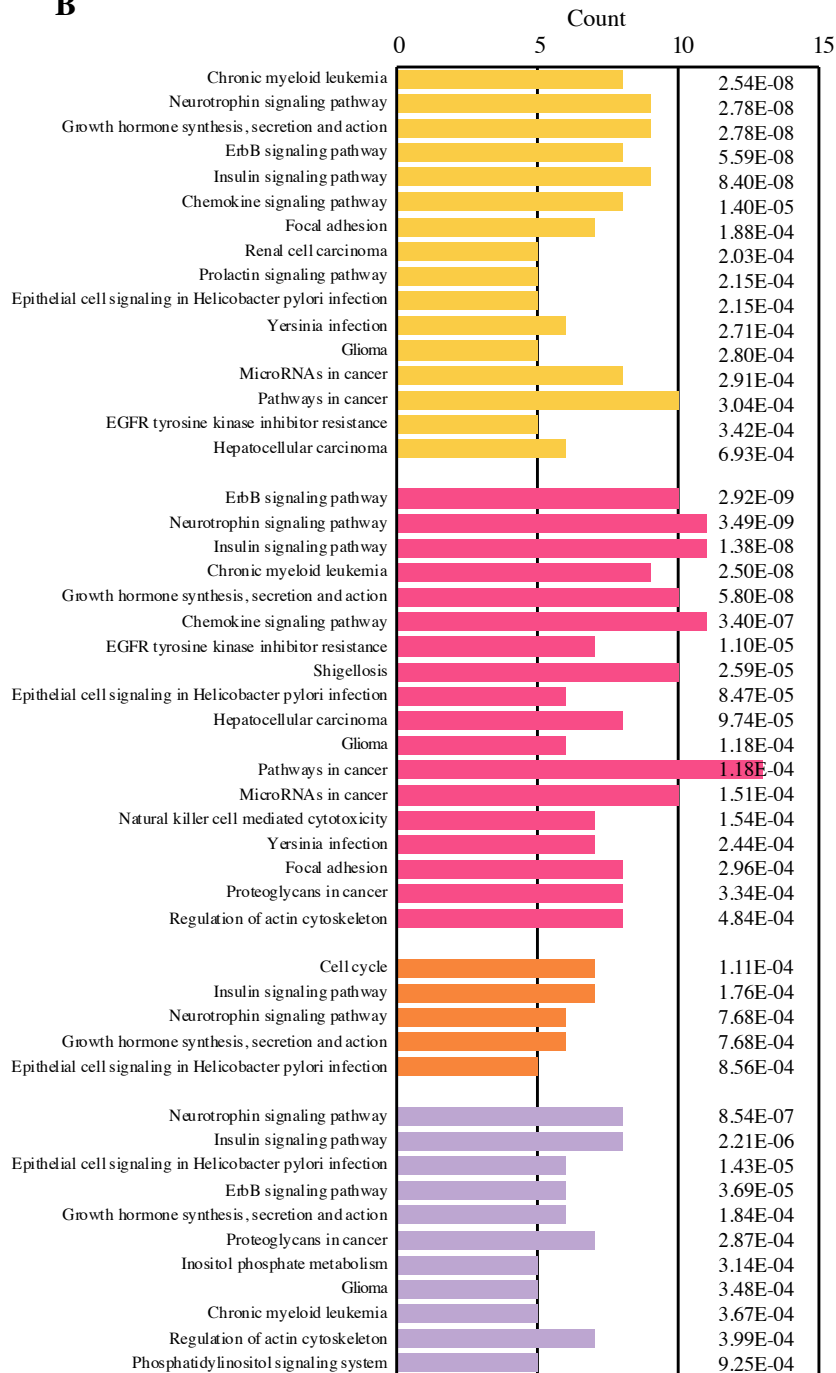

Supplement: s1 [file s1]
